# Supplementary material
Source: PubMed Central journal article supplement (PMC4001370)
Supplement: supp_tpc.114.122887_tpc122887Supplemental.pdf [file supp_tpc.114.122887_tpc122887Supplemental.pdf]

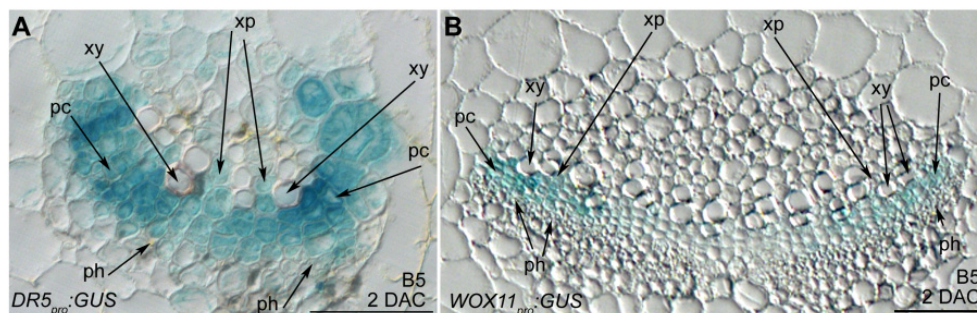

**Supplemental Figure 1. *DR5* and *WOX11* Expression in Leaf Explants during Adventitious Root Formation.**

(A) and (B) Sections of 2-DAC leaf explants from *DR5*<sub>pro</sub>:*GUS* (A) and *WOX11*<sub>pro</sub>:*GUS* (B) transgenic plants. Sample preparations for (A) and (B) were similar to those in Figure 1K and Figure 3H, respectively, except for toluidine blue staining, which was not performed for (A) and (B). Thus, compared with Figure 1K and Figure 3H, cells of different types in (A) and (B) can be more clearly viewed.

xy, xylem; xp, xylem parenchyma cell; pc, procambium; ph, phloem. Scale bars, 500  $\mu$ m in (A) and (B).

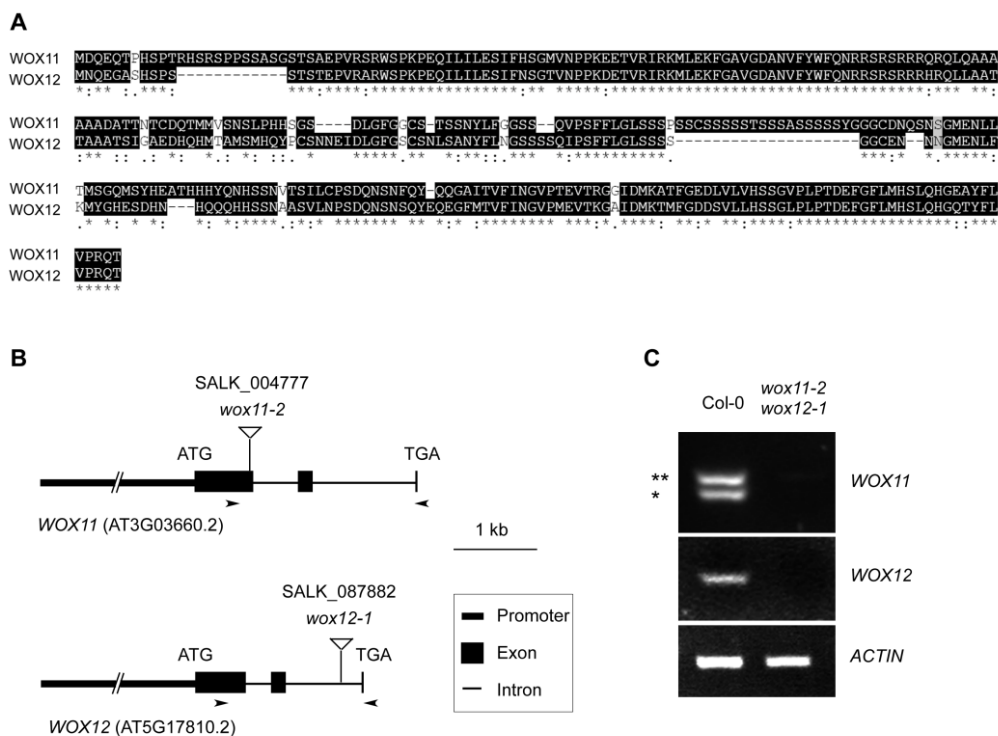

**Supplemental Figure 2. Identification of the *wox11* and *wox12* Mutants.**

(A) Alignment of the WOX11 and WOX12 protein sequences. The two proteins share 60% and 67% amino acid sequence identity and similarity, respectively. Alignment was performed using Clustal X ([www.clustal.org](http://www.clustal.org)).

(B) Diagram of structures of the WOX11 and WOX12 genes. T-DNA insertions in the *wox11-2* and *wox12-1* alleles are shown. Arrowheads indicate the primer positions used for identification of insertions. Note that the T-DNA insertion site of WOX12 is in the last intron, indicating that *wox12-1* might be a weak allele.

(C) RT-PCR using cDNAs from 10-DAC wild-type Col-0 and *wox11-2 wox12-1* leaf explants cultured on CIM. Full length WOX11 and WOX12 transcripts were undetectable in the double mutant. Asterisks \* and \*\* indicate two alternative splicing transcripts of WOX11 (\*, At3g03660.1; and \*\*, At3g03660.2), consistent with the predicted data from TAIR ([www.arabidopsis.org](http://www.arabidopsis.org)).

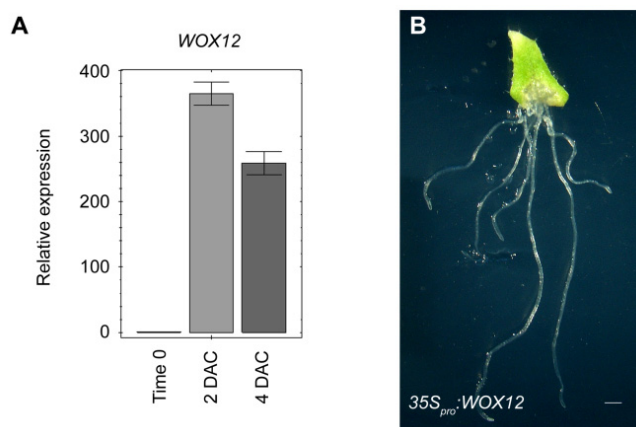

### Supplemental Figure 3. *WOX12* is Involved in Adventitious Root Formation.

**(A)** qRT-PCR to analyze *WOX12* expression in adventitious root formation from the wild-type leaf explants cultured on B5 medium. The value of time-0 leaf explants was arbitrarily fixed at 1.0. Note that *WOX12* expression was highly induced during adventitious root formation.

**(B)** A 12-DAC leaf explant of  $35S_{pro}:WOX12$  showing multiple regenerated adventitious roots. A total of 30 leaf explants from two independent  $35S_{pro}:WOX12$  lines were analyzed with the similar results.  $35S_{pro}:WOX12$  was constructed by insertion of genomic DNA encoding the full length of *WOX12* into the pMON530 vector.

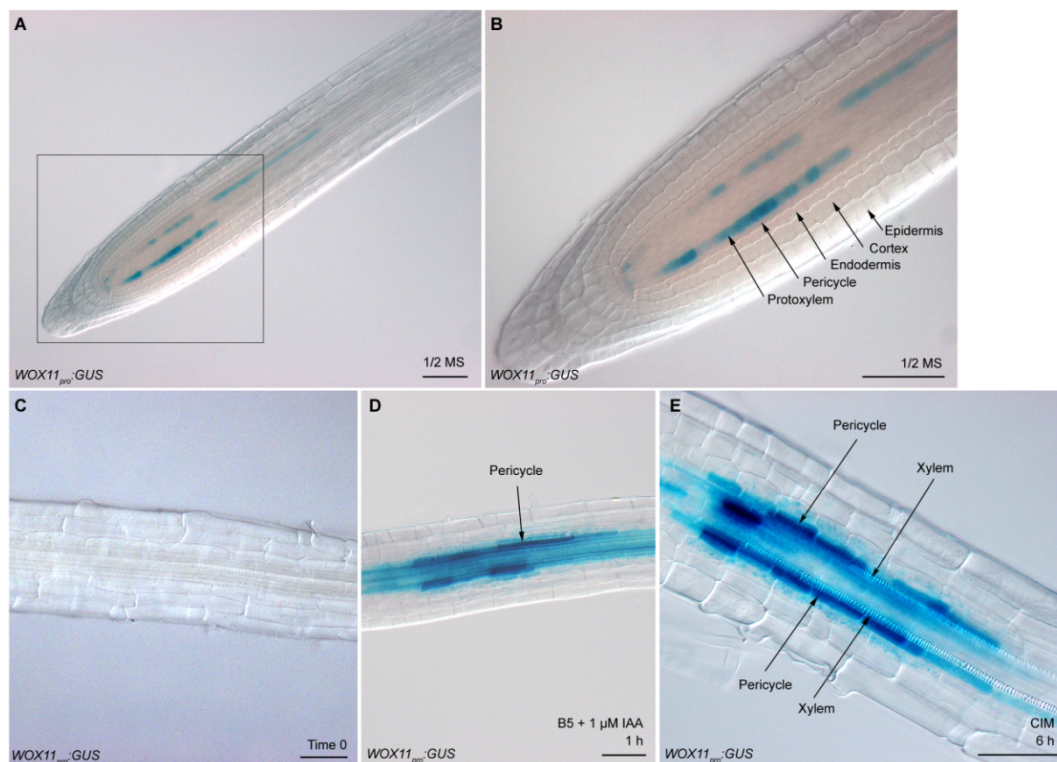

#### Supplemental Figure 4. Auxin Induces *WOX11* Expression in Root Pericycle Cells.

(A) and (B) GUS staining in the apical region of the primary root of a *WOX11<sub>pro</sub>:GUS* transgenic line. GUS staining was shown in the protoxylem cells. The image in (B) is the close-up of the boxed region in (A). The role of *WOX11* in protoxylem is not yet known as the *wox11-2 wox12-1* double mutant exhibited normal protoxylem cells.

(C) At time 0, GUS staining was not detectable in the elongation region of a primary root of the *WOX11<sub>pro</sub>:GUS* plant.

(D) and (E) GUS staining was rapidly induced in the elongation region of primary roots of the *WOX11<sub>pro</sub>:GUS* plants with auxin treatment. Plants were grown on 1/2 MS medium for 7 days (C), and then seedlings were moved to B5 medium containing 1  $\mu$ M IAA for 1 h (D), or to CIM for 6 h (E). Note that *WOX11* is induced in xylem-pole pericycle cells upon auxin induction. GUS staining was performed by incubation of roots at 37 °C in GUS assay solution for 2 h.

Scale bars, 50  $\mu$ m in (A) to (E).

**Supplemental Table 1. List of Primers Used in This Study.**

| Experiments                         | Primers                 | Sequence (5'→3')                                                         |
|-------------------------------------|-------------------------|--------------------------------------------------------------------------|
| Molecular cloning                   |                         |                                                                          |
| <i>WOX11<sub>pro</sub>:GUS</i>      | WOX11 <sub>pro</sub> -F | gtcgacTGAGCTCATCTAACTGTTACG                                              |
|                                     | WOX11 <sub>pro</sub> -R | ggatccTGCTTTGAAGAATATTGATATTATC                                          |
| <i>35S<sub>pro</sub>:WOX11</i>      | WOX11-F                 | agactcATGGACCAAGAACAACACC                                                |
|                                     | WOX11-R                 | gaattcGCCAGTTCATGTCTGTCTTG                                               |
| <i>35S<sub>pro</sub>:WOX12</i>      | WOX12-F                 | tcccccgaggATGAATCAAGAAGGTGCTTCACATAG                                     |
|                                     | WOX12-R                 | ggaattcGTTTCATGTCTGTCTCGGTAC                                             |
| <i>35S<sub>pro</sub>:WOX11-SRDX</i> | WOX11-SRDX-F            | gaagatctATGGACCAAGAACAACACC                                              |
|                                     | WOX11-SRDX-R            | ccggaattcTCAAGCAAACCCCTAAACGCAACTCCA<br>AGTCTAAGTCAAGTGTCTGTCTTGAACC     |
| <i>35S<sub>pro</sub>:LBD29</i>      | LBD29-F                 | gaagatctcatATGACTAGTTCAGCTCTAG                                           |
|                                     | LBD29-R                 | ccgctcgagTCACGAGAAGGAGATGTAGC                                            |
| <i>pER8:LBD29-SRDX</i>              | LBD29-SRDX-F            | ccgctcgagATGACTAGTTCAGCTCTAG                                             |
|                                     | LBD29-SRDX-R            | cgtctagaTCAAGCAAACCCCTAAACGCAACTCCAA<br>GTCTAAGTCAAGCGAGAAGGAGATGTAGCCAA |
| qRT-PCR and RT-PCR                  |                         |                                                                          |
| <i>WOX11</i>                        | WOX11-F3                | CGCAACCACCAACACTTGTGACC                                                  |
|                                     | WOX11-R3                | CCTGAGGAATGCACCAAACC                                                     |
|                                     | WOX11-R6                | AAGACATCTGTTGCATCACC                                                     |
| <i>WOX12</i>                        | WOX12-F3                | GGGGTTTGGAAAGTTGTAGC                                                     |
|                                     | WOX12-R4                | CGATAGACACGAAATCAATAGAGG                                                 |
| <i>LBD16</i>                        | LBD16-F49               | CCTGTTTATGGATGTGTCTC                                                     |
|                                     | LBD16-R49               | ACATAACTACCAACTTATC                                                      |
| <i>LBD18</i>                        | LBD18-F50               | TCTTTGCTCTTCAGCAACAG                                                     |
|                                     | LBD18-R50               | ATGTATCGATCAAACCAAC                                                      |

|              |           |                               |
|--------------|-----------|-------------------------------|
| <i>LBD29</i> | LBD29-F51 | TCATATCTTTGCTCTCCAAC          |
|              | LBD29-R51 | CCCATATTCTTGATAGAACC          |
|              | LBD29-R   | ccgctcgagTCACGAGAAGGAGATGTAGC |
| <i>LBD33</i> | LBD33-F52 | CGTTGCTCACATCTTCGCTC          |
|              | LBD33-R53 | CGCGTCGAATTTTGTGTGC           |
| <i>SRDX</i>  | SRDX-R70  | AACTCCAAGTCTAAGTCAAG          |
| <i>ACTIN</i> | ACTIN-F   | TGGCATCA(T/C)ACTTTCTACAA      |
|              | ACTIN-R   | CCACCACT(G/A/T)AGCACAATGTT    |

Note that lowercase letters represent additional nucleotides to introduce restriction sites, and the italic letters indicate SRDX.
